# Supplementary material for: Examining the interplay between air pollution, surface vegetation cover, and stroke prevalence in East Africa: An ecological perspective
Source: Research Square preprint supplement (doi:10.21203/rs.3.rs-5694027/v1), 2025-02-11
Supplement: Supplementary file 1 [file e333d4dc749041cd8f963472.docx]

**Examining the interplay between air pollution, surface vegetation cover, and stroke prevalence in East Africa: An ecological perspective**

**Supplemental materials**

**
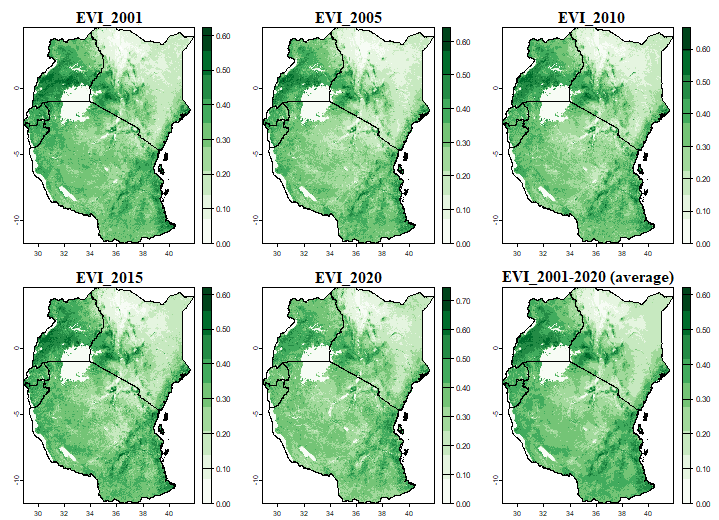
**

**Fig. A.1 –** Spatial and temporal distribution of the enhanced vegetation index

**
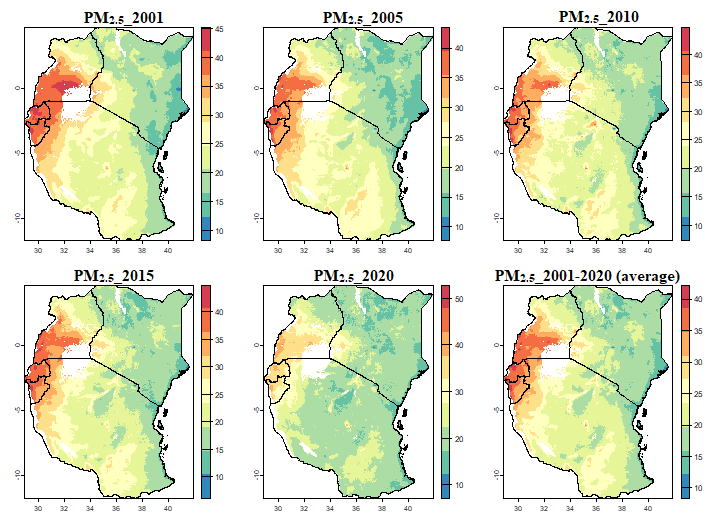
**

**Fig. A.2 –** Spatial and temporal distribution of PM2.5

**
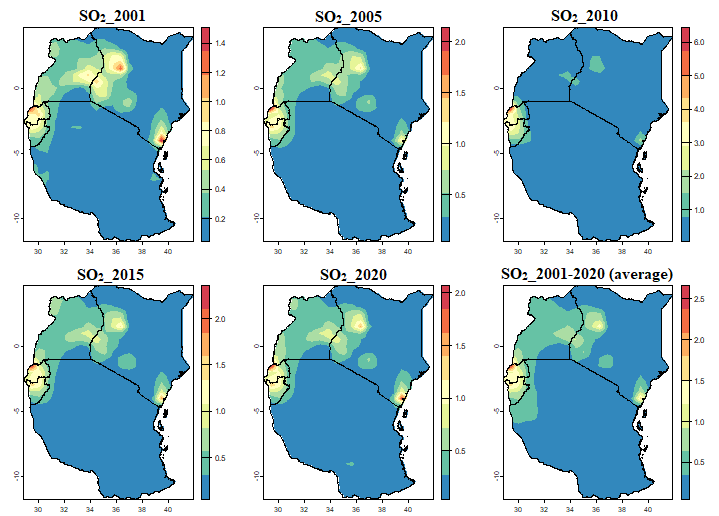
**

**Fig. A.3 –** Spatial and temporal distribution of SO2

**
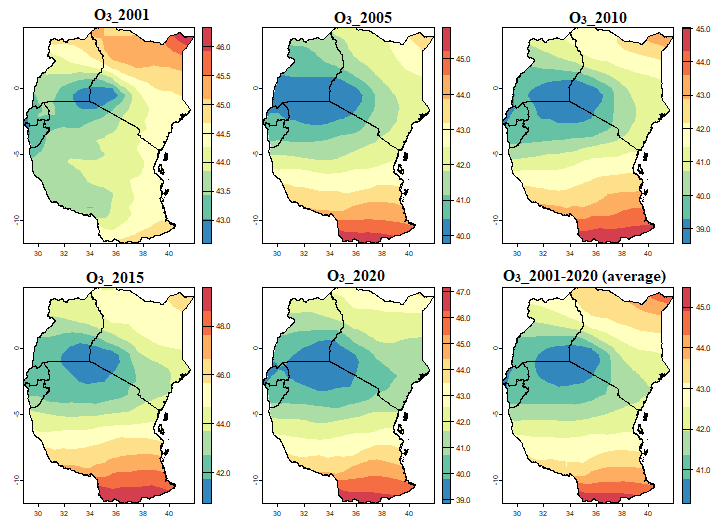
**

**Fig. A.4 –** Spatial and temporal distribution of O3

**
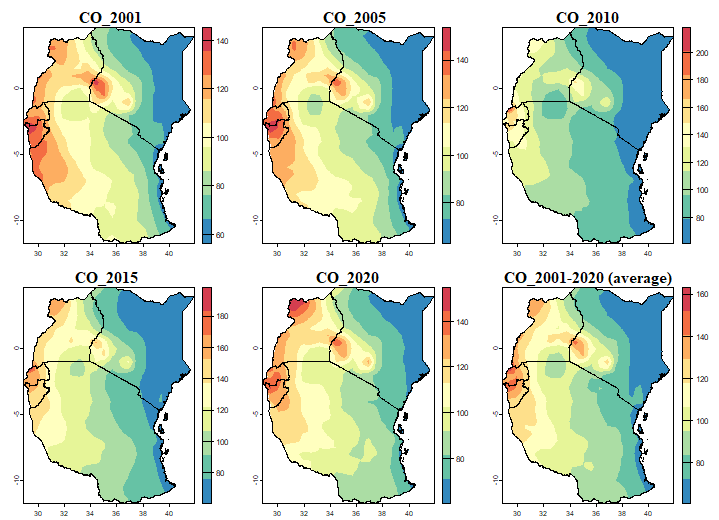
**

**Fig. A.5 –** Spatial and temporal distribution of the CO
